# Supplementary material for: Tissue-Specific RNA Expression Marks Distant-Acting Developmental Enhancers
Source: PLoS Genet. 2014 Sep 4;10(9):e1004610. doi: 10.1371/journal.pgen.1004610 (PMC4154669; doi:10.1371/journal.pgen.1004610)
Supplement: Table S6 — Enriched motifs of known transcription factors among limb-specific TSTRs. (XLSX) [file pgen.1004610.s010.xlsx]

## Sheet: supplementary table 6
Table S6: Enriched motifs of known transcription factors among limb-specific TSTRs
Rank	Motif	Name	P-value	log P-pvalue	q-value (Benjamini)	# Target Sequences with Motif	% of Targets Sequences with Motif	# Background Sequences with Motif	% of Background Sequences with Motif
1		BMYB(HTH)/Hela-BMYB-ChIPSeq(GSE27030)/Homer	1e-08	-19.34	0	2291	0.8307	34354.3	0.7867
2		CHR/Cell-Cycle-Exp/Homer	1e-07	-16.32	0	1578	0.5722	22808.9	0.5223
3		E2F4(E2F)/K562-E2F4-ChIP-Seq(GSE31477)/Homer	1e-05	-12.94	0.0002	524	0.19	6870.1	0.1573
4		GFX(?)/Promoter/Homer	0.0001	-11.19	0.0007	25	0.0091	147.3	0.0034
5		NRF1(NRF)/MCF7-NRF1-ChIP-Seq/Homer	0.001	-8.811	0.0064	213	0.0772	2623.3	0.0601
6		Tbet(T-box)/CD8-Tbet-ChIP-Seq(GSE33802)/Homer	0.001	-8.743	0.0064	1897	0.6878	28617.2	0.6553
7		Maz(Zf)/HepG2-Maz-ChIP-Seq(GSE31477)/Homer	0.001	-8.441	0.0066	1617	0.5863	24144.5	0.5529
8		E2F1(E2F)/Hela-E2F1-ChIP-Seq/Hoemr	0.001	-8.367	0.0066	285	0.1033	3673.6	0.0841
9		E2F6(E2F)/Hela-E2F6-ChIP-Seq(GSE31477)/Homer	0.001	-8.273	0.0066	669	0.2426	9382.3	0.2148
10		Sp1(Zf)/Promoter/Homer	0.001	-8.24	0.0066	352	0.1276	4654.2	0.1066
11		E2F(E2F)/Cell-Cycle-Exp/Homer	0.001	-7.839	0.0077	89	0.0323	966.6	0.0221
12		CEBP:AP1/ThioMac-CEBPb-ChIP-Seq/Homer	0.001	-7.464	0.0103	1521	0.5515	22726.4	0.5204
13		E2F7(E2F)/Hela-E2F7-ChIP-Seq(GSE32673)/Homer	0.001	-7.409	0.0103	160	0.058	1948.1	0.0446
14		Gfi1b(Zf)/HPC7-Gfi1b-ChIP-Seq/Homer	0.001	-7.37	0.0103	1350	0.4895	20030.6	0.4587
15		Tcf12(HLH)/GM12878-Tcf12-ChIP-Seq/Homer	0.001	-7.151	0.0112	1355	0.4913	20135.9	0.4611
16		E2A(HLH)/proBcell-E2A-ChIP-Seq/Homer	0.001	-6.934	0.0131	1864	0.6759	28283.2	0.6477
17		GRE/RAW264.7-GRE-ChIP-Seq/Homer	0.01	-6.243	0.0246	578	0.2096	8195.3	0.1877
18		Myf5(bHLH)/GM-Myf5-ChIP-Seq(GSE24852)/Homer	0.01	-6.226	0.0246	1123	0.4072	16606.3	0.3803
19		ZBTB33/GM12878-ZBTB33-ChIP-Seq/Homer	0.01	-6.094	0.0255	58	0.021	615.1	0.0141
20		TATA-Box(TBP)/Promoter/Homer	0.01	-6.078	0.0255	2293	0.8314	35387.4	0.8103
21		ZNF711(Zf)/SH-SY5Y-ZNF711-ChIP-Seq/Homer	0.01	-5.791	0.0313	1988	0.7208	30429.9	0.6968
22		CRE(bZIP)/Promoter/Homer	0.01	-5.769	0.0313	360	0.1305	4958.1	0.1135
23		MyoD(HLH)/Myotube-MyoD-ChIP-Seq/Homer	0.01	-5.639	0.0333	1142	0.4141	16980.1	0.3888
24		Atf1(bZIP)/K562-ATF1-ChIP-Seq(GSE31477)/Homer	0.01	-5.309	0.0443	1221	0.4427	18265.6	0.4183
25		Elk1(ETS)/Hela-Elk1-ChIP-Seq(GSE31477)/Homer	0.01	-5.069	0.0541	908	0.3292	13407.5	0.307
26		Stat3(Stat)/mES-Stat3-ChIP-Seq/Homer	0.01	-4.979	0.0569	1024	0.3713	15226.9	0.3487
27		Tcfcp2l1(CP2)/mES-Tcfcp2l1-ChIP-Seq/Homer	0.01	-4.697	0.0726	336	0.1218	4695.1	0.1075
